# Supplementary material for: Nueva especie de Platyderus Stephens, 1828 (Coleoptera Carabidae) de España y nuevos datos sobre Platyderus toribioi
Source: Royal Society of Chemistry journal article supplement (doi:10.1039/c8ra06900j), 2010-01-01
Supplement: c8ra06900j1.pdf [file c8ra06900j1.pdf]

**The adsorption and aggregate properties of dendritic cationic tetrameric  
surfactants**

Yangchun Xie<sup>a</sup>, Jie Li<sup>a\*</sup>, Zuofeng Li<sup>b</sup>, Tong Sun<sup>a</sup>, Yipeng Wang<sup>a</sup>, Guangmiao Qu<sup>a</sup>

*<sup>a</sup>College of Chemistry and Chemical Engineering, Northeast Petroleum University,  
Daqing, 163318, P. R. China*

*<sup>b</sup>Natural Gas Branch Testing Center, Daqing Oil field Co. Ltd., Daqing, 163321, China*

\*Corresponding author, email [lijie838@nepu.edu.cn](mailto:lijie838@nepu.edu.cn)

## Contents

1. FTIR spectra of 4C<sub>n</sub>teraQ with n = 12, 14, 16.
2. <sup>1</sup>H NMR spectra of 4C<sub>n</sub>teraQ with n = 12, 14, 16.

1. FTIR spectra of  $4C_n$ teraQ with  $n = 12, 14, 16$ .

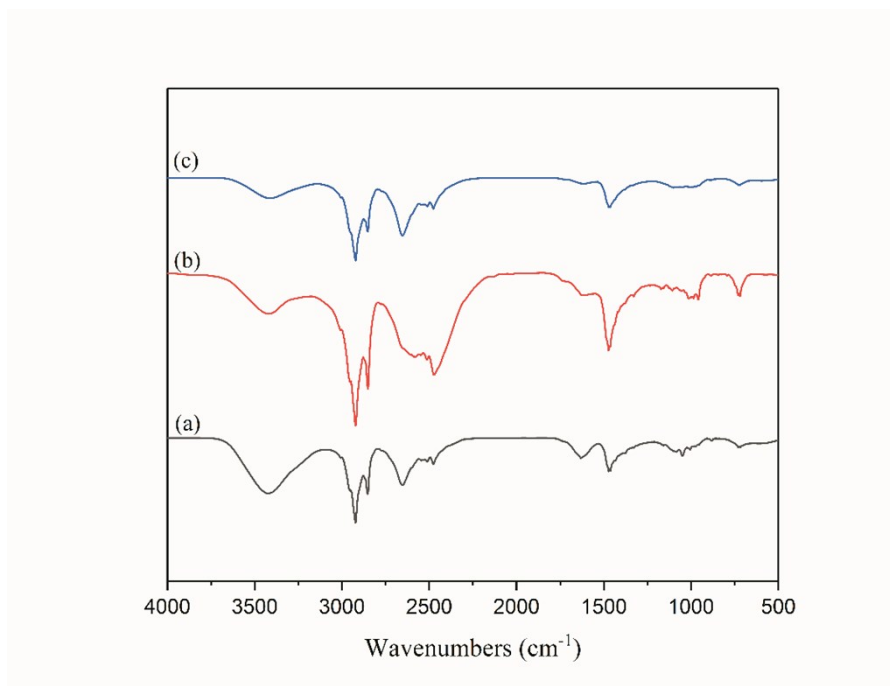

Fig. S1. FTIR spectra of  $4C_n$ teraQ for (a)  $4C_{12}$ teraQ, (b)  $4C_{14}$ teraQ, (c)  $4C_{16}$ teraQ.

2.  $^1\text{H}$  NMR spectra of  $4C_n$ teraQ with  $n = 12, 14, 16$ .

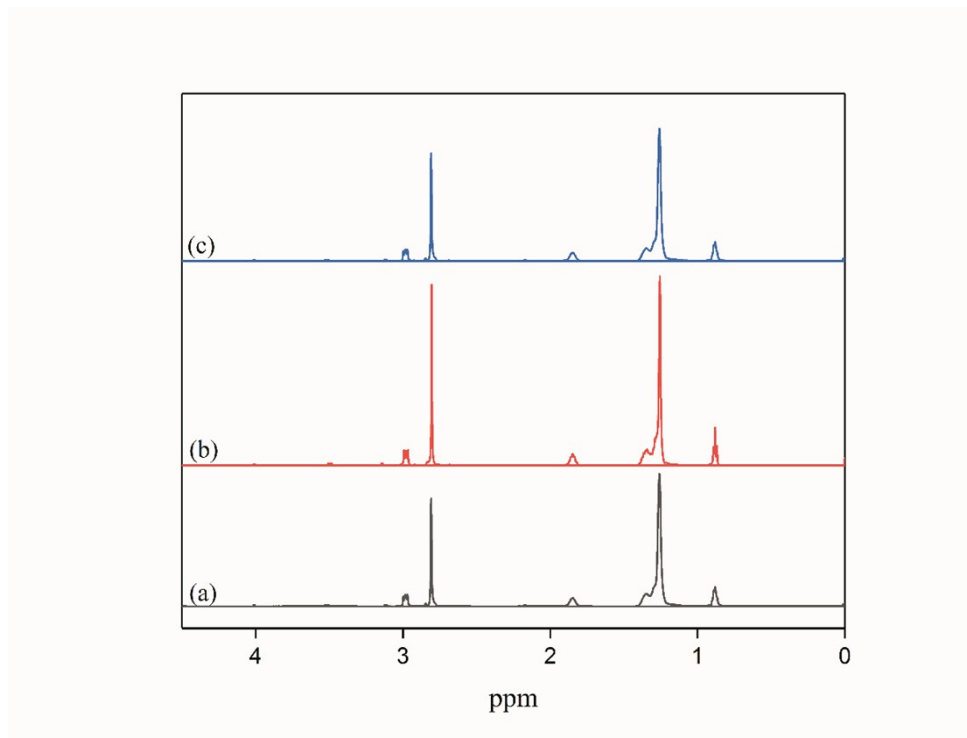

Fig. S2.  $^1\text{H}$  NMR spectra of  $4C_n$ teraQ for (a)  $4C_{12}$ teraQ, (b)  $4C_{14}$ teraQ, (c)  $4C_{16}$ teraQ.
